sume that 90 per cent of the  $N_2O$  remains in solution.

Third, our inability to substantiate the marked discrepancies with halothane is not surprising when one considers that halothane is five times more soluble than  $N_2O$  and 200 times more soluble than oxygen. On the other hand, diethyl ether is 1,200 times more soluble than  $O_2$ . In concentrations of 1 to 2 per cent (assuming "successful and complete extraction" of gas from the liquid phase), the error for halothane will be small as compared with ether, but substantial even at high oxygen contents (*i.e.*, 1 per cent halothane equilibrated with a liquid phase is equivalent to a content of approximately 2.4 ml/100 ml). Fortunately, the higher solubility allows for lesser extraction of halothane and, in comparison with the extracted  $O_2$ , the measurement yields an error small enough to argue against the maneuver recommended by Goldstein *et al.*<sup>2</sup> We do not argue against scientific accuracy; our intent is to place the controversy in perspective.

We appreciate Dr. Theye's comments and the opportunity for a reply. He is quite correct regarding the error introduced by  $N_2O$  for absolute measurements of  $O_2$  content. The solubility characteristics of halothane hardly warrant modification of the manometric technique as originally described.<sup>4</sup> We purposely omitted reference to this matter in our paper since it might have perpetuated a concern for which there appears to be little justification.

MYRON B. LAVER, M.D.  
*Professor of Anaesthesia, Harvard Medical School  
Anesthetist, Massachusetts General Hospital*

NABIL R. FAHMY, M.D., F.F.A.R.C.S.  
*Instructor in Anaesthesia, Harvard Medical School  
Assistant Anesthetist, Massachusetts General Hospital  
Boston, Massachusetts 02114*

#### REFERENCES

1. Theye RA: The determination of  $O_2$  and  $CO_2$  content in blood containing halothane. *ANESTHESIOLOGY* 30:325-327, 1969
2. Goldstein F, Gibbon JH Jr, Allbritten FF Jr, *et al*: The combined manometric determination of oxygen and carbon dioxide in blood, in the presence of low concentrations of ethyl ether. *J Biol Chem* 182:815-820, 1950
3. Fahmy NR, Laver MB: Hemodynamic response to ganglionic blockade with pentolinium during  $N_2O$ -halothane anesthesia in man. *ANESTHESIOLOGY* 44:6-15, 1976
4. Van Slyke DD, Neill JM: The determination of gases in blood and other solutions by vacuum extraction and manometric measurement. *J Biol Chem* 61:523-573, 1924
5. Theye RA, Kirklm JW, Fowler WS: Performance and film volume of sheet and screen vertical-film oxygenators. *J Thorac Cardiovasc Surg* 43:481-488, 1969
6. Altman PL, Dittmer DS: *Biological Handbooks, Respiration and Circulation*. FASEB. Bethesda, Md., 1971, p 19

(Accepted for publication February 25, 1976.)

### Early Use of Enflurane in Obstetrics

To the Editor:—Coleman and Downing<sup>1</sup> state "... there has been no report on use of enflurane in obstetric anesthesia." There was a prior report. Among the first, if not the first, was the work of Westmoreland *et al.*<sup>2</sup>

RICHARD B. CLARK, M.D.  
*Professor  
Departments of Anesthesiology and  
Obstetrics-Gynecology  
Obstetrical Anesthesiologist*

*University of Arkansas  
Medical Center  
Little Rock, Arkansas 72201*

#### REFERENCES

1. Coleman AJ, Downing JW: Enflurane anesthesia for cesarean section. *ANESTHESIOLOGY* 43:354-357, 1975
2. Westmoreland RT, Evans JA, Chastain GM: Obstetric use of enflurane (Ethrane). *South Med J* 67:527-530, 1974

(Accepted for publication February 25, 1976.)
